# Supplementary material
Source: PubMed Central journal article supplement (PMC4358484)
Supplement: ijcem0008-0546-f5.pdf [file ijcem0008-0546-f5.pdf]

## Powerful prognostic biomarkers in gastric cancer

**Supplementary Table 1.** Main characteristics of protein expressions on prognostic factors

| Stratification               | Type                  | MMP9              |       |        | STAT3             |       |        |
|------------------------------|-----------------------|-------------------|-------|--------|-------------------|-------|--------|
|                              |                       | Number of studies | Total | Number | Number of studies | Total | Number |
| Case-Control                 | carcinomas            | 33                | 4367  | 2652   | 13                | 1256  | 717    |
|                              | Non-neoplastic mucosa |                   |       | 1715   |                   |       | 539    |
| Overall 5-year survival      | Mortal                | 8                 | 862   | 548    | 3                 | 551   | 119    |
|                              | Survival              |                   |       | 314    |                   |       | 244    |
| The depth of invasion        | T3 + T4               | 40                | 3252  | 1887   | 11                | 725   | 446    |
|                              | T1 + T2               |                   |       | 1365   |                   |       | 279    |
| Lymph node status            | Positive              | 51                | 3957  | 2363   | 12                | 1187  | 609    |
|                              | Negative              |                   |       | 1594   |                   |       | 578    |
| Distant metastasis           | Positive              | 16                | 1322  | 273    | 4                 | 333   | 66     |
|                              | Negative              |                   |       | 1049   |                   |       | 267    |
| TNM stage                    | III + IV              | 28                | 2534  | 1418   | 10                | 831   | 470    |
|                              | I + II                |                   |       | 1116   |                   |       | 361    |
| Histological differentiation | Poorly                | 44                | 3485  | 1834   | 13                | 426   | 519    |
|                              | Well/moderate         |                   |       | 1651   |                   |       | 508    |
| Size                         | ≥ 5 cm                | 14                | 1085  | 566    | 6                 | 611   | 327    |
|                              | < 5 cm                |                   |       | 519    |                   |       | 284    |
| Sex                          | Male                  | 22                | 1920  | 1376   | 12                | 995   | 658    |
|                              | Female                |                   |       | 544    |                   |       | 337    |
| Age                          | > 60                  | 10                | 943   | 457    | 9                 | 817   | 489    |
|                              | ≤ 60                  |                   |       | 486    |                   |       | 328    |
